# Supplementary material for: Snapshots of actin and tubulin folding inside the TRiC chaperonin
Source: PubMed Central journal article supplement (PMC9113939; doi:10.1038/s41594-022-00755-1), 2022-04-21

Uncropped unprocessed scans of Extended Data Fig.1a

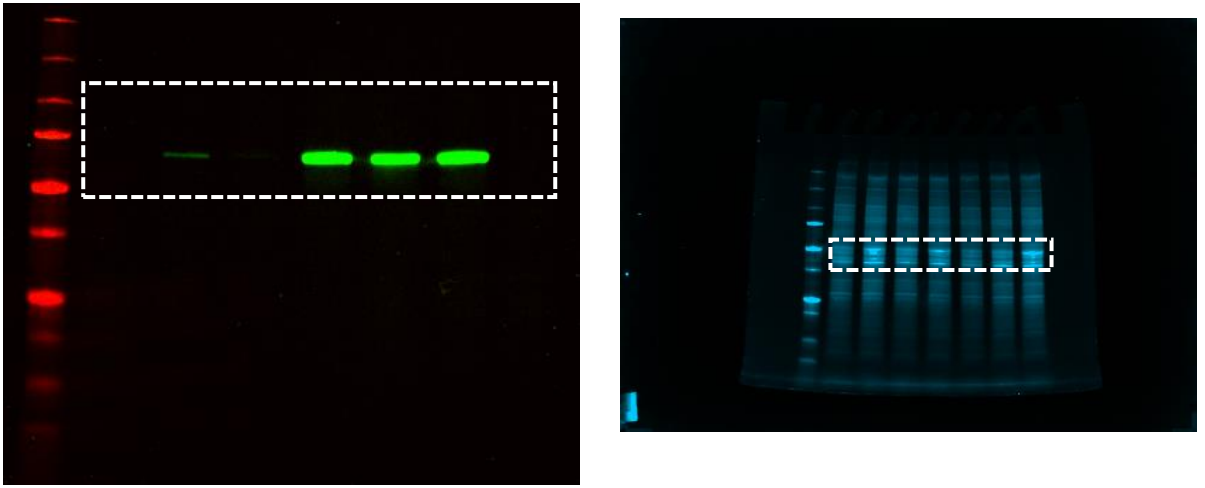

Uncropped unprocessed blot and SDS-PAGE of Extended Data Fig. 1c

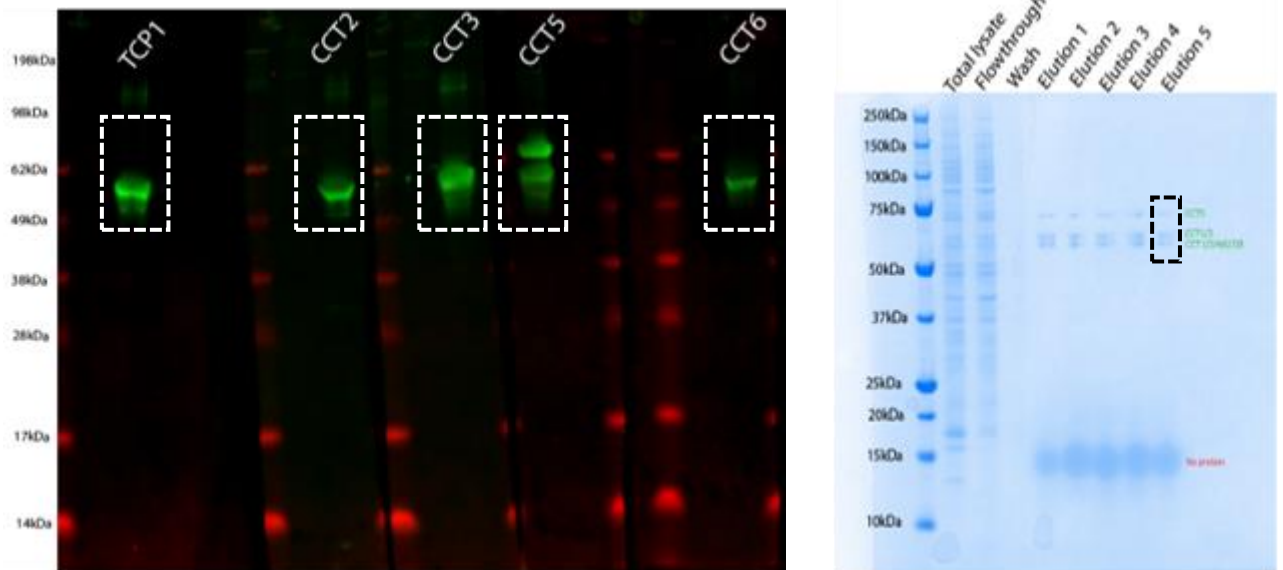

Uncropped image of  
Extended Data Fig. 1c

Uncropped image of  
Extended Data Fig. 1e

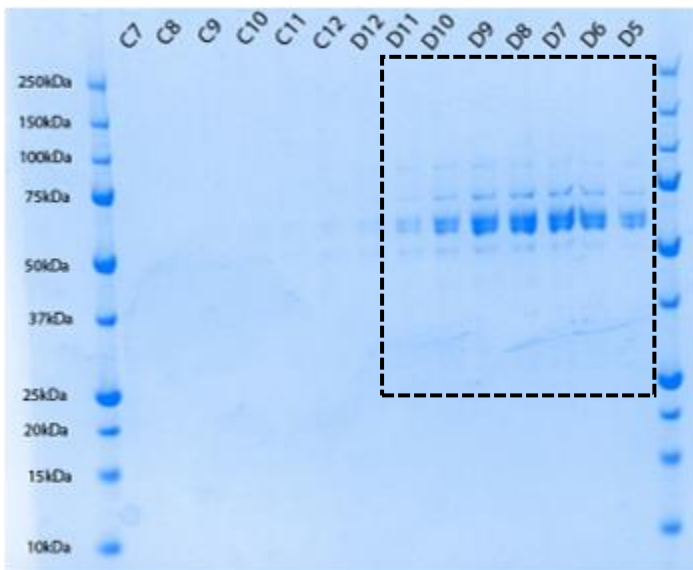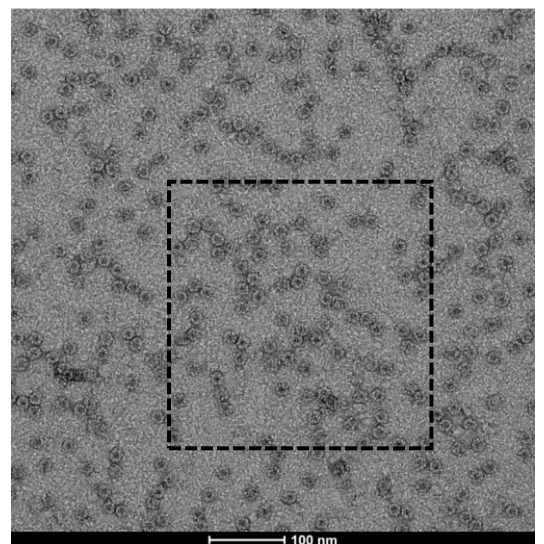

Supplement: 41594_2022_755_MOESM7_ESM.pdf [file 41594_2022_755_MOESM7_ESM.pdf]
