# Supplementary material for: Snapshots of actin and tubulin folding inside the TRiC chaperonin
Source: PubMed Central journal article supplement (PMC9113939; doi:10.1038/s41594-022-00755-1), 2022-04-21

Uncropped SDS-PAGE gel, shown as it is, in Extended Data Fig. 3a left

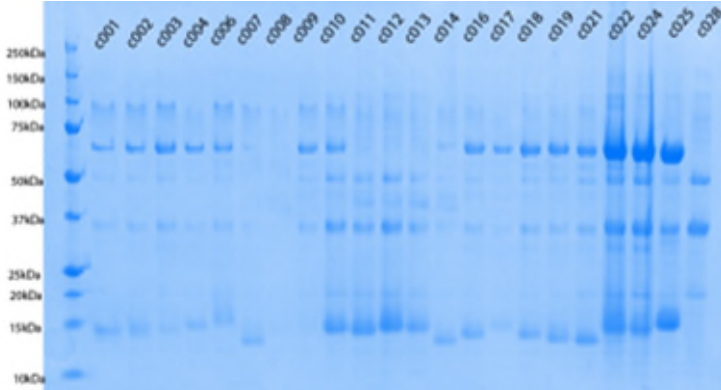

Uncropped, unannotated SDS-PAGE gel for Extended Data Fig. 3a right

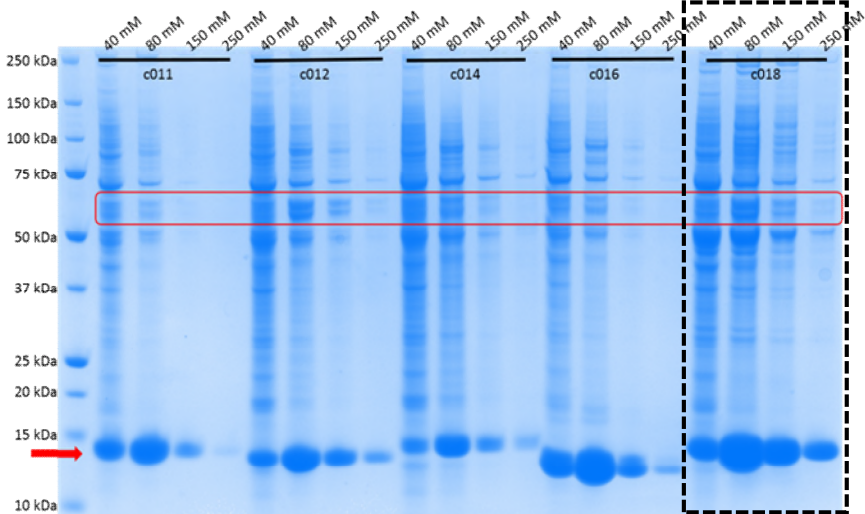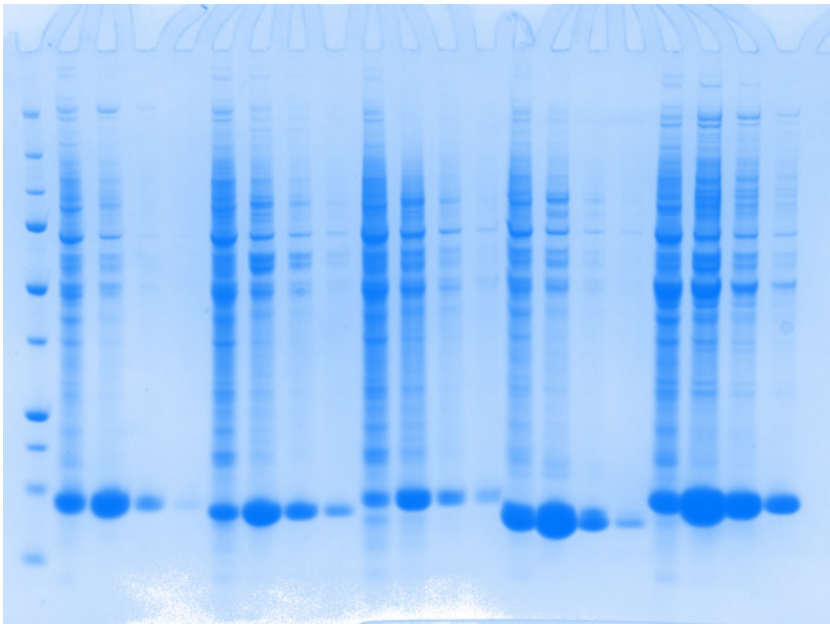

Supplement: 41594_2022_755_MOESM9_ESM.pdf [file 41594_2022_755_MOESM9_ESM.pdf]
