# Supplementary material for: Snapshots of actin and tubulin folding inside the TRiC chaperonin
Source: PubMed Central journal article supplement (PMC9113939; doi:10.1038/s41594-022-00755-1), 2022-04-21

Uncropped image, shown as it is, in Extended Data Fig. 4a

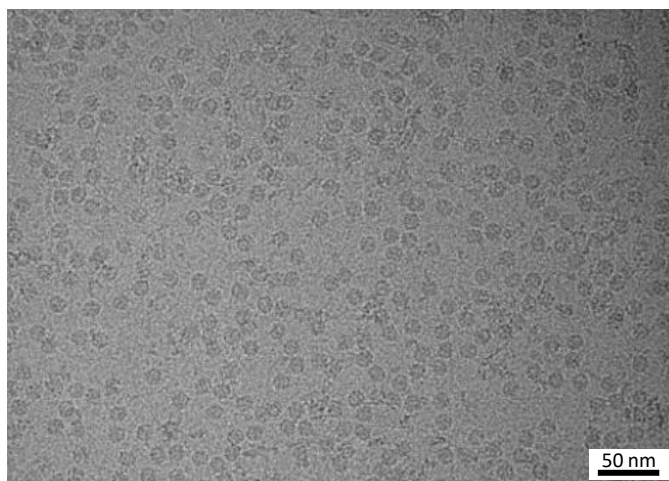

Supplement: 41594_2022_755_MOESM12_ESM.pdf [file 41594_2022_755_MOESM12_ESM.pdf]
